# Supplementary material for: Heat Stress Induces Shifts in the Rumen Bacteria and Metabolome of Buffalo
Source: MDPI journal article supplement (doi:10.3390/ani12101300), 2022-05-18
Supplement: s1 [file s1]

## Article

# Heat Stress Induces Shifts in the Rumen Bacteria and Metabolome of Buffalo

Zichen Wang <sup>1,†</sup>, Kaifeng Niu <sup>2,†</sup>, Hossam E. Rushdi <sup>3</sup>, Mingyue Zhang <sup>1</sup>, Tong Fu <sup>1</sup>, Tengyun Gao <sup>1</sup>, Liguang Yang <sup>2</sup>, Shenhe Liu <sup>1,\*</sup> and Feng Lin <sup>1,\*</sup>

<sup>1</sup> College of Animal Science and Technology, Henan Agricultural University, Zhengzhou 450046, China; shirleywang2020@126.com (Z.W.); zmy1978339762@163.com (M.Z.); futong2004@126.com (T.F.); dairycow@163.com (T.G.)

<sup>2</sup> College of Animal Science and Technology, Huazhong Agricultural University, Wuhan 430000, China; nkf\_19930806@163.com (K.N.); yangliguo2006@foxmail.com (L.Y.)

<sup>3</sup> Department of Animal Production, Faculty of Agriculture, Cairo University, Giza 12613, Egypt; hosamrushdi@agr.cu.edu.eg

\* Correspondence: liushenhe2015@163.com (S.L.); linfeng7207@163.com (F.L.)

† These authors contributed equally to this work.

**Table S1.** Detailed sequence information of rumen samples of buffaloes using high-throughput sequencing.

| Sample | Seq_number | Base_number | Mean_length | Min_length | Max_length |
|--------|------------|-------------|-------------|------------|------------|
| H10    | 43571      | 18040789    | 414.054968  | 201        | 431        |
| H12    | 59390      | 24765862    | 417.003906  | 253        | 434        |
| H14    | 48017      | 19989670    | 416.304017  | 353        | 445        |
| H43    | 60209      | 25025951    | 415.651331  | 277        | 437        |
| H59    | 55790      | 23582750    | 422.705682  | 215        | 468        |
| H62    | 51681      | 21509724    | 416.201776  | 216        | 505        |
| N10    | 65293      | 27273589    | 417.710765  | 218        | 476        |
| N12    | 60253      | 24863760    | 412.655967  | 365        | 452        |
| N14    | 59704      | 24580669    | 411.708914  | 255        | 445        |
| N43    | 70671      | 29492820    | 417.325636  | 209        | 481        |
| N59    | 55066      | 22703242    | 412.291468  | 238        | 446        |
| N62    | 48310      | 20005083    | 414.098178  | 248        | 448        |
| Total  | 677955     | 281833909   | 415.642717  | 201        | 505        |

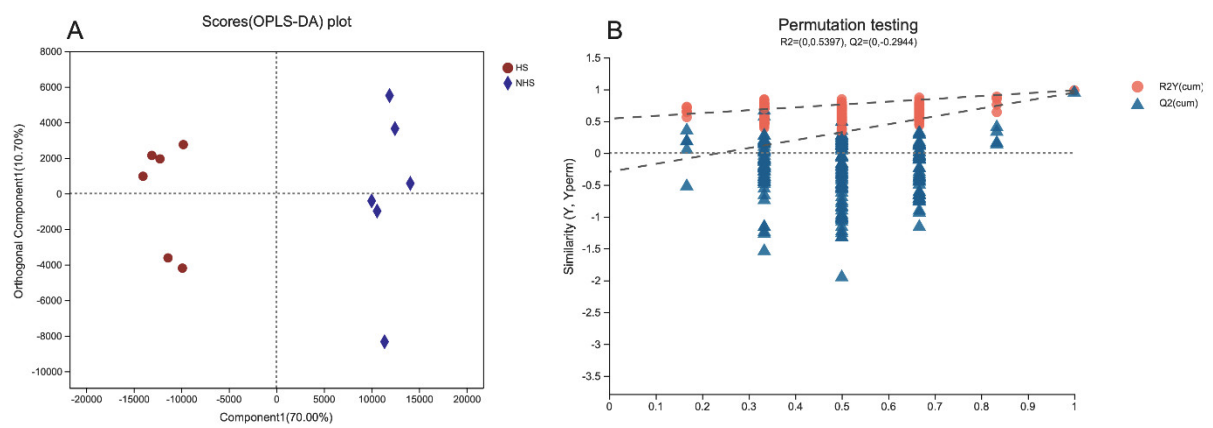

**Figure S1.** Orthogonal partial least squares discriminant analysis (OPLS-DA) plot (A) and response permutation testing (B) of rumen metabolites in comparisons of the non-heat stress (NHS) and heat stress (HS) conditions.  $R^2Y(cum)$  and  $Q^2$  indicates the cumulative interpretation power and predictive power of the model, respectively.
